# Supplementary material
Source: PubMed Central journal article supplement (PMC4817222)

Supplementary Figures.

Supplementary Figure 1. Positive ion ESI-FT-ICR mass spectra of extracts of summer-harvested soybean leaves: A) acetonitrile and B) methylene chloride.

Supplementary Figure 2. Negative ion ESI-FT-ICR mass spectra of extracts of summer-harvested soybean leaves: A) ethanol, B) acetonitrile and C) methylene chloride.

Supplementary Figure 1.

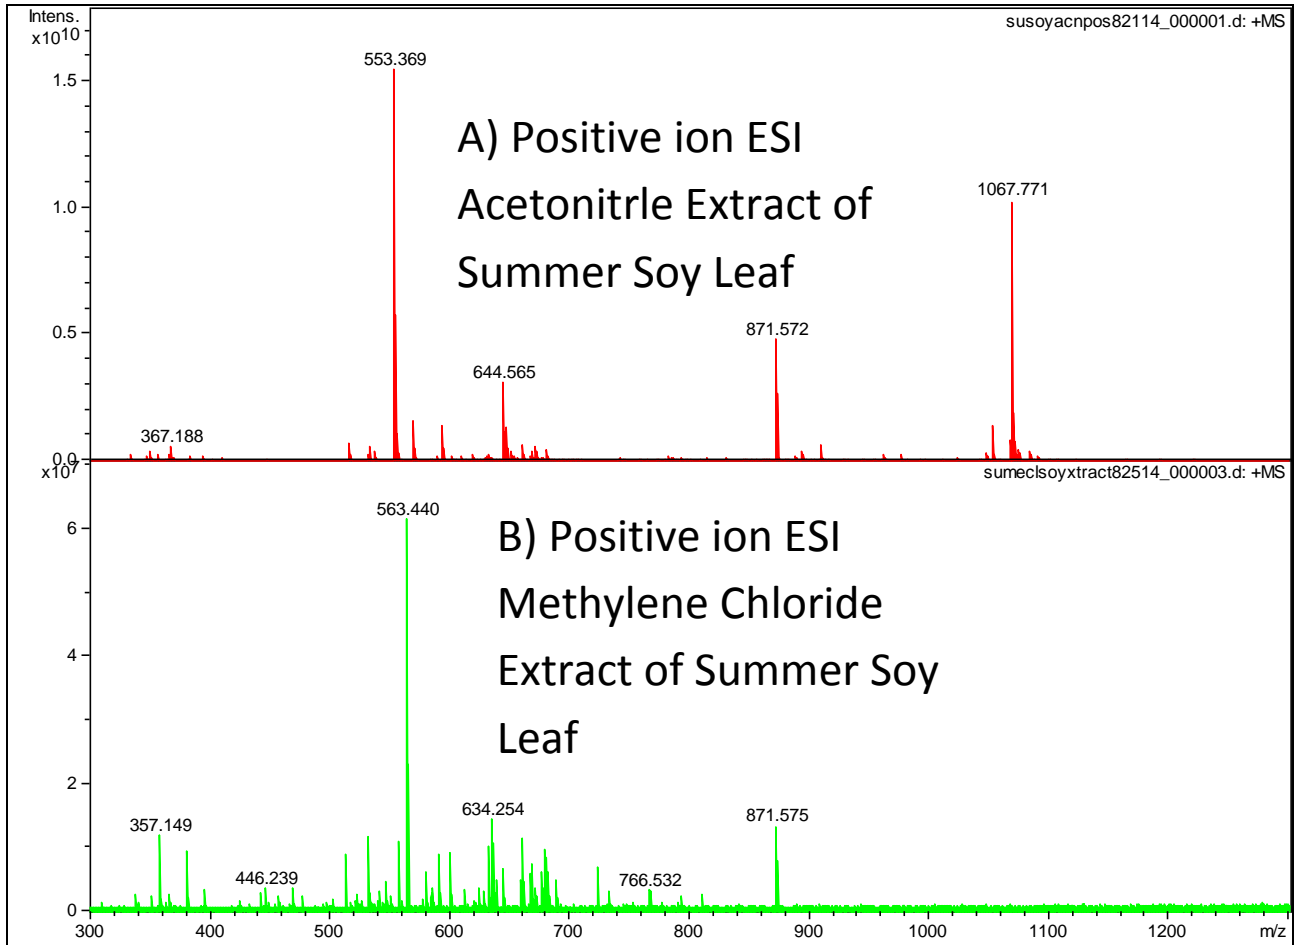

Supplementary Figure 2.

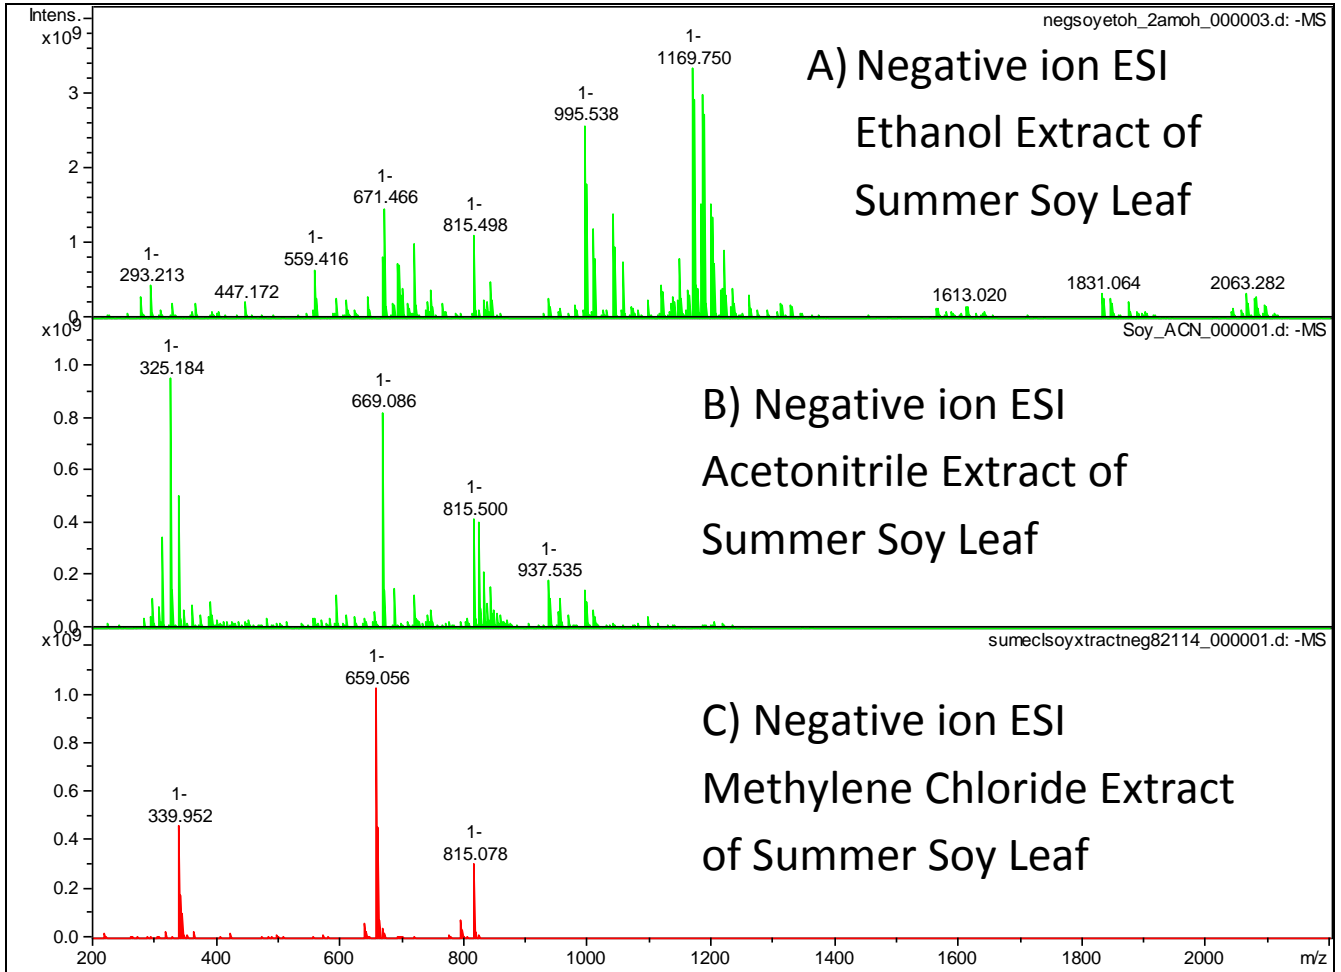

Supplement: NIHMS767349-supplement-Supp_Figs.pdf [file NIHMS767349-supplement-Supp_Figs.pdf]
